# Supplementary material
Source: PubMed Central journal article supplement (PMC6957232)
Supplement: NIHMS1544800-supplement-1.pdf [file NIHMS1544800-supplement-1.pdf]

## Appendix 1:

### Peptide sequences and reference standards targeted for the 17 biomarkers surveyed in this study

| Protein Name                                 | Protein Symbol | Endogenous Peptide Sequence | Peptide Reference Standard Sequence*     | Dominant Charge State | Peptide Ions Monitored (Qtrap 5500) | Peptide Ion Quantified |
|----------------------------------------------|----------------|-----------------------------|------------------------------------------|-----------------------|-------------------------------------|------------------------|
| CD44 antigen                                 | CD44           | YGFIEGHVVIPR                | YGFIEGHVVIP*R                            | 3                     | y4, y5, y6                          | y4                     |
| Complement Factor I                          | CFI            | VFSLQWGEVK                  | VFSLQWGEV*K                              | 2                     | y5, y6, y7, y8                      | y5                     |
| Leucine-Rich alpha-2-glycoprotein            | Lrg1           | VAAGAFQGLR                  | VAAGAFQGL*R<br>(13C labeled only)        | 2                     | y5, y7, y8, y9                      | y8                     |
| Epidermal Growth Factor Receptor             | EGFR           | IPLNLQIIR                   | IPLNLQII*R<br>(13C labeled only)         | 2                     | y5, y6, y7, y8                      | y7                     |
| Inter-alpha-trypsin inhibitor heavy chain H3 | Itih3          | EVSFDVELPK                  | EVSFDVEL*PK<br>(13C labeled only)        | 2                     | y5, y6, y7, y8                      | y5                     |
| Coagulation factor V                         | F5             | NFFNPPIISR                  | NFFNPPII*SR<br>(13C labeled only)        | 2                     | y6, y7, y8, b8                      | y6                     |
| Hemopexin                                    | Hpx            | LWWLDLK                     | LWWLDL*K<br>(13C labeled only)           | 2                     | y4, y5, y6, b5                      | y5                     |
| Vitamin D-binding protein                    | Gc             | VLEPTLK                     | VLEPTL*K<br>(13C labeled only)           | 2                     | y4, y5, y6                          | y4                     |
| Inter-alpha-trypsin inhibitor, Heavy chain 4 | ITIH4          | FAHTVVTSR                   | FAHTVVT*SR                               | 3                     | y3, y4, b3, b4                      | y3                     |
| Serum Amyloid P                              | APCS           | GYVIKPLVWV                  | GYVIKPL*VWV<br>(13C labeled only)        | 2                     | y6, y7, y8, b9                      | b9                     |
| Fetuin B                                     | FetuB          | IFFESVYGQCK                 | IFFESVYGQ <b>C</b> *K                    | 2                     | y6, y7, y8, y9                      | y9                     |
| C-reactive protein                           | Crp            | ESDTSYVSLK                  | ESDTSYVSL*K<br>(13C labeled only)        | 2                     | y5, y6, y8                          | y6                     |
| Sulfhydryl Oxidase 1                         | QSOX1          | LAGAPSEDPQFPK               | LAGAPSEDPQ <b>F</b> *K                   | 2                     | y5, y7, y9, b4                      | y9                     |
| Peptidase inhibitor 16                       | PI16           | WDEELAAFAK                  | WDEELAA <b>F</b> *K                      | 2                     | y6, y8, y9                          | y8                     |
| Cadherin-2 (N-Cadherin)                      | Cdh2           | GPPFQELVR                   | GPPFQEL*VR<br>(13C Labeled Only)         | 2                     | y6, y7, b3                          | y6                     |
| Dipeptidyl peptidase 4                       | DPP4           | WEYYDSVYTER                 | WEYYDSV <b>Y</b> *TER                    | 2                     | y7, y8, y9, b5                      | y9                     |
| extracellular superoxide dismutase [Cu-Zn]   | Sod3           | VTGVVLFRR                   | VTGVV <b>L</b> *FR<br>(13C Labeled Only) | 2                     | y4, y5, y6, y7                      | y6                     |

Bolded\* indicates <sup>13</sup>C/<sup>15</sup>N amino acid unless otherwise indicated

**Appendix 2:** Detailed pipeline for the use of training cases to select a classification method and panel consisting of 2-5 biomarkers. The data is first used to produce a set of candidate panels, then each panel and each classifier from an array of methods is evaluated using leave-one-out cross validation on the dataset to produce a pooled ROC curve for that panel and classifier combination. The combination that yields the highest sensitivity at 80% specificity is selected.

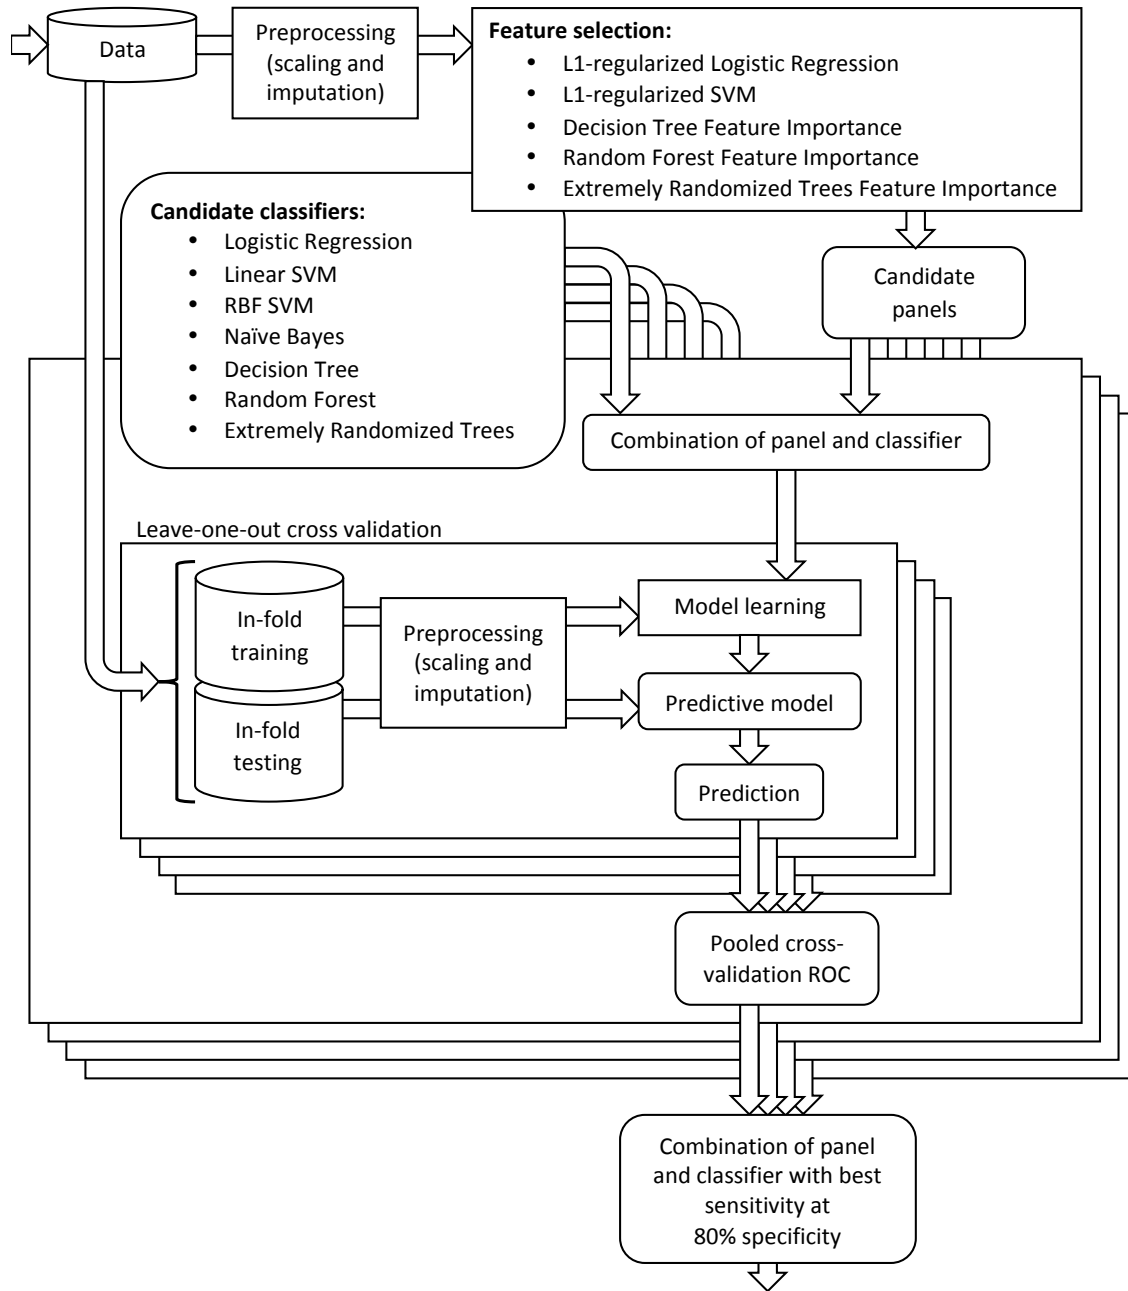

## Appendix 3: SUPPLEMENTARY METHOD INFORMATION

### Description of measurements

For all target biomarkers, a relative chromatographic area ratio of the biomarker compared to its reference standard was calculated in 3-5 technical replicates per patient. The geometric mean of the replicates' relative area ratios was taken to be the numeric measurement representative of the level of the biomarker for that patient. Relative ratios were generated using internal reference standards that were spiked into each of the patient protein samples in the same amount prior to trypsin digestion. The reference standards were made in lots of approximately 150 trypsin digests per lot. Two lots were used in this analysis and were compared to ensure correct scaling of the data by analyzing ten patient cases with both master mixes. A standard curve was generated comparing the patient pairs with both master mix lots. The linear equation generated from the two compared lots was used to scale the second set of patient data so that it had the same relative internal standard expression as the set of patient data generated from the first lot of material. Hemopexin only utilized the first five patient cases because the very high hydrophobicity of its reference peptide was such that one of the two trypsin digests used for the scaling was not representative of the first digest.

| Protein Name                                 | Protein Abbreviation | Equation for Old/New Conversion |
|----------------------------------------------|----------------------|---------------------------------|
| Leucine-Rich Alpha-2-Glycoprotein            | LRG1                 | $y = 2.065x + 0.1801$           |
| Serum Amyloid P                              | APCS                 | $y = 3.2542x + 2.3711$          |
| Fetuin B                                     | FETUB                | $y = 4.9706x + 0.0248$          |
| Inter-Alpha-trypsin inhibitor heavy chain 4  | ITIH4                | $y = 1.4203x - 0.1016$          |
| C-Reactive Protein                           | CRP                  | $y = 1.7692x + 0.017$           |
| Epidermal Growth Factor Receptor             | EGFR                 | $y = 1.4633x + 0.0165$          |
| Inter-Alpha-trypsin inhibitor heavy chain H3 | ITIH3                | $y = 1.3013x + 0.3541$          |
| Coagulation Factor V                         | F5                   | $y = 2.0608x + 0.1706$          |
| Hemopexin                                    | HPX*                 | $y = 2.9936x - 1.1312$          |
| Vitamin D Binding Protein                    | VitD                 | $y = 1.2839x - 0.1121$          |
| Complement Factor I                          | CFI                  | $y = 3.076x + 1.5671$           |
| CD44                                         | CD44                 | $y = 0.8927x + 0.5184$          |
| Peptidyl Peptidase Inhibitor 16              | PI16                 | $y = 2.0276x + 0.0919$          |
| Superoxide Dismutase 3                       | SOD3                 | $y = 2.4956x + 0.0408$          |
| Quiescin Q6 Sulfhydryl Oxidase 1             | QSOX1                | $y = 1.8174x - 0.004$           |
| Dipeptidyl Peptidase 4                       | DPP4                 | $y = 1.1712x + 0.0355$          |
| Cadherin 2                                   | CDH2                 | $y = 1.6377x + 0.0034$          |

## **Development of screening models based on blood protein data**

We sought to identify small panels of 2-5 biomarkers that could identify cancer compared to low-risk cancer-free cases and localized cancer (TNM stages 1&2) compared to regional cancer (TNM stage 3). We cast the screening tasks as classification tasks, and evaluated an array of classification methods for each task. We cast the problem of selecting a panel of 2-5 biomarkers as a feature selection problem and used several feature selection methods for identifying candidate panels of biomarkers in a data-driven manner. We use an objective criterion for identifying the best-performing panel and classifier, and perform an evaluation on held-aside data. Figure 1 (main text) illustrates the evaluation process and Appendix 2 illustrates the panel selection process.

## **Classification methods**

For both classification tasks described above we evaluated an array of classification methods: logistic regression, support vector machine classifiers with both linear and radial basis function (RBF) kernels, Gaussian naïve Bayes, the decision tree classifier, the random forest classifier, and extremely randomized trees classifier. We used the implementations from the scikit-learn toolkit (version 0.17.1)<sup>1</sup> respectively `linear_model.LogisticRegression`, `svm.SVC`, `naive_bayes.GaussianNB`, `tree.DecisionTreeClassifier`, `ensemble.RandomForestClassifier`, and `ensemble.ExtraTreesClassifier`. The decision tree, random forest, and extremely randomized trees classifiers used the Gini criterion for impurity<sup>2</sup>. Both the random forest and extremely randomized trees classifiers used ensembles of 100 trees.

## **Data preprocessing**

In using the classification methods above, we use one subset of the data available to us, a training set, to build a predictive model, and use the model to make a prediction about a second subset of the data, a test set, which we use to evaluate the prediction by comparing the prediction about the patient's condition to the observed condition. Since we used leave-one-out cross validation in our analyses, different subsets of the data served as training and test sets, depending on the stage of the analysis. Each time we used a training set and a test set, we preprocessed the biomarker measurements in a manner tailored to the classification method used, and care was taken to never use information from a test set in preprocessing a training set (while one can use information from a training set in preprocessing a test set). For logistic regression and the support vector machine classifier, training data were shifted to zero mean and scaled to unit variance, and the same shift and scaling (estimated from the training data) were applied to test data. For the naïve Bayes classifier, data were log-transformed (natural logarithm). No scaling was used for the tree-based methods. For all methods, wherever particular biomarker measurements were missing, training data were mean-imputed and test data were imputed with the mean of the training data.

### **Data-driven panel and classifier selection**

In order to select small panels of biomarkers (2-5) for screening based on a dataset  $D$  which contains measurements from all 17 markers and class labels (patient conditions) corresponding to each of the two classification tasks, we used several feature selection approaches, specifically: L1 regularized logistic regression, L1 regularized support vector machine classifiers with a linear kernel, and feature importance rankings for classification trees,

random forests, and extremely randomized trees models. For each panel size of interest, each method was used to produce a candidate panel.

To find a panel of proteins of a given size using each of the L1-regularized methods, we employed a grid search over the values of the regularization constant. We preprocessed the data by mean-imputing the biomarker measurements and shifting and scaling them to zero mean and unit variance over the dataset  $D$ . We used the implementations in scikit-learn (linear\_model.LogisticRegression and svm.LinearSVC for logistic regression and linear support vector machine respectively), which represent regularization strength using a parameter  $C$  that takes values between 0 and 1, with lower values corresponding to stronger regularization and 1 corresponding to no regularization. We varied the  $C$  parameter from 0.001 to 1.0 in steps of 0.001. For each setting of  $C$  and a given set of training samples, we learned a model and model coefficients. Strong L1 regularization leads to models where all but a few features (biomarkers) have zero coefficients associated with them. We then took the lowest value of  $C$  for which the number of nonzero coefficients was equal to the panel size we were interested in, and took the proteins associated with those nonzero coefficients to be our candidate panel.

To find a panel of proteins of a given size using each of the tree-based methods, we considered feature importances. For each method, we preprocessed the dataset  $D$  by mean-imputing the biomarker measurements and learned the tree-based model the data. We considered the Gini importance measures of the features in the resultant model. We took the biomarkers with the highest importance to form the candidate panels (e.g. for a panel of size 3, the three biomarkers with the highest Gini importance were used).

Each of the L1-regularized feature selection methods and each of the tree-based feature selection methods above produced a candidate biomarker panel for a given panel size, together

producing a set of at most 5 candidate biomarker panels for each panel size. Given these panel candidates and the seven classifiers listed above, we applied leave-one-out cross validation within the dataset D and pooled the predictions of the classifiers across cross-validation folds to produce a receiver operator characteristic (ROC) curve evaluating the performance of each combination of classifier and panel candidate. We took the best combination to be the one that reached the highest sensitivity at 80% specificity or above.

By the process above, we determine a best combination of panel and classifier by our criterion. We then used that panel and classifier combination to learn a classification model from the entire dataset D.

### **Evaluation pipeline**

We evaluated the process described above, of finding a small panel of proteins and associated classifier in terms of how well it generalizes to new data that was not used for training the model. We set aside almost 50% of the data, stratified based on patient class, as validation data, leaving the rest of the data to comprise the training set. For each panel size, within the training set, we ran the panel and method selection process within leave-one-out cross validation folds. This produced a panel, method, and patient class prediction for each fold. The resultant ROC curve represents the performance of our panel and method selection process. We also examined how consistent the panel and method selections were across folds.

For the best performing (in terms of highest sensitivity reached at 80% specificity or above) panel size, we used the panel and method selection process to select a panel and method using the entire training set, and show ROC curves produced when evaluating the resultant model on the evaluation set.

1. Fabian Pedregosa GV, Alexandre Gramfort, Vincent Michel, Bertrand Thirion, Olivier Grisel, Mathieu Blondel, Peter Prettenhofer, Ron Weiss, Vincent Dubourg, Jake Vanderplas, Alexandre Passos, David Cournapeau, Matthieu Brucher, Matthieu Perrot, Édouard Duchesnay: Scikit-learn: Machine Learning in Python. *Journal of Machine Learning Research* 12:5, 2011
2. Breiman L, Friedman, J., Olshen, R., Stone, C.: *Classification and regression trees*. Monterey, Calif., USA, Wadsworth, 1984



## Appendix 4: Detailed summary of enrolled patients in the study

### Overall Summary:

| Group:                    | # of Cases | Sex (M/F) | Median Age, (range) | Number of Polyps (0/1-2/3+) | Advanced Adenoma Cases | Cancer Stage (1/2/3/Other) | Median Pre-Operative CEA Level, (range)* |
|---------------------------|------------|-----------|---------------------|-----------------------------|------------------------|----------------------------|------------------------------------------|
| Colonoscopy (Non-Cancers) | 212        | 104/108   | 60, (30-80)         | 54/107/51                   | 72                     | N/A                        | N/A                                      |
| Colectomy (Cancers)       | 47         | 26/21     | 62, (37-88)         | N/A                         | N/A                    | 22/13/12/2                 | 1.95 (0.7-119)                           |

\*Does not include 3 cases with CEA levels <0.5, 6 cases with unknown/not measured levels, and one post-operative only measurement

### Colonoscopy/Cancer Free Cases:

| Specimen ID | Sex | Age | Race/Eth. | POLYP COUNT | Polyp Count BIN | Pathology Rating | Polyp Location (Colon vs. Rectum) | Polyp Location effect (Ascending, Transverse, Descending, Rectal) | Pathology Summary                            |
|-------------|-----|-----|-----------|-------------|-----------------|------------------|-----------------------------------|-------------------------------------------------------------------|----------------------------------------------|
| 21154       | M   | 76  | White     | 1           | 1-2             | Low              | Rectal                            | Rectal                                                            | Tubular Adenoma                              |
| 21155       | M   | 51  | White     | 0           | 0               | Normal           | Normal                            | Normal                                                            | Screening normal                             |
| 21214       | F   | 52  | White     | 1           | 1-2             | Low              | Colon                             | Descending                                                        | Tubular Adenoma                              |
| 21216       | F   | 65  | White     | 1           | 1-2             | Low              | Colon                             | Descending                                                        | Hyperplastic polyp                           |
| 21344       | F   | 73  | White     | 3           | 3+              | Advanced Adenoma | Colon                             | Ascending & Descending                                            | Non-neoplastic mucosa                        |
| 21474       | M   | 66  | White     | 3           | 3+              | Low              | Colon                             | Ascending & Descending                                            | Non-dysplastic polyp, tubular adenoma        |
| 21478       | M   | 50  | Hispanic  | 1           | 1-2             | Low              | Rectal                            | Rectal                                                            | Hyperplastic polyp                           |
| 21488       | M   | 68  | White     | 2           | 1-2             | Low              | Colon and Rectal                  | Transverse & Rectum                                               | Hyperplastic polyp, tubular adenoma          |
| 21489       | F   | 60  | White     | 1           | 1-2             | Advanced Adenoma | Rectal                            | Rectal                                                            | Tubulovillous Adenoma                        |
| 21527       | F   | 72  | White     | 1           | 1-2             | Low              | Colon                             | Ascending & Descending                                            | Tubular Adenoma                              |
| 21528       | M   | 60  | White     | 2           | 1-2             | Advanced Adenoma | Colon                             | Ascending                                                         | Sessile serrated adenoma, Tubular adenoma    |
| 21529       | M   | 80  | Asian     | 1           | 1-2             | Low              | Colon                             | Descending                                                        | Tubular Adenoma                              |
| 21530       | F   | 65  | White     | 0           | 0               | Normal           | Normal                            | Normal                                                            | Screening normal                             |
| 21684       | M   | 64  | White     | 0           | 0               | Normal           | Normal                            | Normal                                                            | Screening normal                             |
| 21685       | F   | 50  | White     | 0           | 0               | Normal           | Normal                            | Normal                                                            | Screening normal                             |
| 21755       | F   | 50  | White     | 0           | 0               | Normal           | Normal                            | Normal                                                            | Screening normal                             |
| 21756       | M   | 51  | White     | 2           | 1-2             | Advanced Adenoma | Colon and Rectal                  | Descending & Rectal                                               | Tubular adenoma, tubulovillous adenoma       |
| 21836       | M   | 52  | White     | 2           | 1-2             | Low              | Colon                             | Descending                                                        | Tubular Adenoma                              |
| 21837       | F   | 57  | Black     | 1           | 1-2             | Low              | Colon                             | Descending                                                        | Tubular Adenoma                              |
| 21958       | F   | 69  | White     | 0           | 0               | Normal           | Normal                            | Normal                                                            | Screening normal                             |
| 21968       | M   | 50  | White     | 2           | 1-2             | Low              | Colon                             | Ascending & Descending                                            | Hyperplastic polyp                           |
| 22797       | M   | 52  | White     | 7           | 3+              | Advanced Adenoma | Colon and Rectal                  | Ascending, Transverse, Descending, Rectum                         | Hyperplastic polyp, sessile serrated adenoma |
| 22798       | M   | 58  | Black     | 5           | 3+              | Advanced Adenoma | Colon and Rectal                  | Ascending, Transverse, Rectum                                     | Tubular adenoma, tubulovillous adenoma       |
| 22800       | M   | 63  | White     | 1           | 1-2             | Low              | Colon                             | Ascending                                                         | Sessile serrated adenoma                     |
| 22847       | M   | 50  | White     | 0           | 0               | Normal           | Normal                            | Normal                                                            | Screening normal                             |
| 22848       | M   | 67  | White     | 0           | 0               | Low              | Colon                             | Normal                                                            | Screening normal                             |
| 22849       | M   | 61  | White     | 0           | 0               | Normal           | Normal                            | Normal                                                            | Screening normal                             |
| 22869       | M   | 51  | White     | 1           | 1-2             | Low              | Colon                             | Ascending                                                         | Tubular Adenoma                              |

| Specimen ID | Sex | Age | Race/Eth. | POLYP COUNT | Polyp Count BIN | Pathology Rating | Polyp Location (Colon vs. Rectum) | Polyp Location effect (Ascending, Transverse, Descending, Rectal) | Pathology Summary                         |
|-------------|-----|-----|-----------|-------------|-----------------|------------------|-----------------------------------|-------------------------------------------------------------------|-------------------------------------------|
| 22872       | F   | 60  | White     | 1           | 1-2             | Low              | Colon and Rectal                  | Ascending & Rectal                                                | Screening normal                          |
| 22887       | M   | 55  | White     | 9           | 3+              | Advanced Adenoma | Colon and Rectal                  | Transverse, Descending, Rectal                                    | Hyperplastic polyp, tubular adenoma       |
| 22888       | F   | 68  | White     | 0           | 0               | Normal           | Normal                            | Normal                                                            | Screening normal                          |
| 22891       | F   | 58  | White     | 3           | 3+              | Low              | Colon                             | Ascending, Transverse, Descending                                 | Hyperplastic polyp, tubular adenoma       |
| 22892       | F   | 51  | White     | 3           | 3+              | Low              | Colon and Rectal                  | Transverse, Descending, Rectal                                    | Hyperplastic polyp, tubular adenoma       |
| 22909       | F   | 55  | White     | 0           | 0               | Normal           | Normal                            | Normal                                                            | Screening normal                          |
| 22910       | F   | 55  | White     | 1           | 1-2             | Advanced Adenoma | Colon                             | Ascending                                                         | Tubular Adenoma                           |
| 22911       | F   | 63  | White     | 2           | 1-2             | Advanced Adenoma | Colon                             | Transverse, Descending                                            | mucosal polyp, tubular adenoma            |
| 22927       | F   | 64  | White     | 1           | 1-2             | Low              | Colon and Rectal                  | Ascending & Rectal                                                | Hyperplastic polyp                        |
| 22928       | F   | 63  | White     | 2           | 1-2             | Low              | Colon                             | Ascending                                                         | Screening normal                          |
| 22929       | M   | 63  | White     | 1           | 1-2             | Low              | Colon                             | Ascending                                                         | Tubular Adenoma                           |
| 22987       | F   | 66  | White     | 0           | 0               | Normal           | Normal                            | Normal                                                            | Screening normal                          |
| 22988       | F   | 64  | White     | 0           | 0               | Normal           | Normal                            | Normal                                                            | Screening normal                          |
| 22989       | M   | 50  | Asian     | 1           | 1-2             | Low              | Colon                             | Transverse                                                        | Tubular Adenoma                           |
| 22996       | M   | 68  | White     | 0           | 0               | Normal           | Normal                            | Normal                                                            | Screening normal                          |
| 22997       | M   | 63  | White     | 3           | 3+              | Low              | Colon                             | Ascending & Descending                                            | Tubular Adenoma                           |
| 23031       | F   | 51  | White     | 0           | 0               | Normal           | Normal                            | Normal                                                            | Screening normal                          |
| 23032       | M   | 51  | White     | 0           | 0               | Normal           | Normal                            | Normal                                                            | Screening normal                          |
| 23051       | F   | 50  | White     | 7           | 3+              | Advanced Adenoma | Rectal                            | Rectal                                                            | Hyperplastic polyp                        |
| 23059       | M   | 52  | White     | 0           | 0               | Normal           | Normal                            | Normal                                                            | Screening normal                          |
| 23060       | F   | 62  | White     | 2           | 1-2             | Low              | Colon                             | Ascending                                                         | Tubular Adenoma                           |
| 23061       | M   | 56  | White     | 3           | 3+              | Advanced Adenoma | Colon and Rectal                  | Ascending, Transverse, Rectum                                     | Lymphoid Aggregate                        |
| 23062       | M   | 60  | White     | 1           | 1-2             | Low              | Colon                             | Ascending                                                         | Tubular Adenoma                           |
| 23076       | M   | 59  | White     | 0           | 0               | Normal           | Normal                            | Normal                                                            | Screening normal                          |
| 23247       | M   | 56  | White     | 2           | 1-2             | Low              | Colon and Rectal                  | Transverse & Rectum                                               | Hyperplastic polyp, tubular adenoma       |
| 23248       | M   | 67  | White     | 1           | 1-2             | Low              | Colon                             | Descending                                                        | Screening normal                          |
| 23250       | M   | 56  | White     | 4           | 3+              | Low              | Colon                             | Ascending, Transverse, Descending                                 | Lymphoid nodule, sessile serrated adenoma |
| 23251       | M   | 51  | White     | 3           | 3+              | Low              | Colon                             | Ascending & Descending                                            | Lymphoid nodule                           |
| 23252       | F   | 58  | White     | 2           | 1-2             | Advanced Adenoma | Colon and Rectal                  | Descending & Rectal                                               | Tubular Adenoma                           |
| 23253       | M   | 69  | White     | 0           | 0               | Normal           | Normal                            | Normal                                                            | Screening normal                          |
| 23254       | M   | 66  | White     | 2           | 1-2             | Low              | Colon                             | Ascending & Descending                                            | Lymphoid nodule                           |

| Specimen ID | Sex | Age | Race/Eth.                                           | POLYP COUNT | Polyp Count BIN | Pathology Rating | Polyp Location (Colon vs. Rectum) | Polyp Location effect (Ascending, Transverse, Descending, Rectal) | Pathology Summary                         |
|-------------|-----|-----|-----------------------------------------------------|-------------|-----------------|------------------|-----------------------------------|-------------------------------------------------------------------|-------------------------------------------|
| 30628       | M   | 52  | Black                                               | 2           | 1-2             | Low              | Colon and Rectal                  | Transverse & Rectum                                               | Tubular Adenoma                           |
| 30653       | F   | 63  | White                                               | 4           | 3+              | Advanced Adenoma | Colon                             | Ascending                                                         | Sessile serrated adenoma                  |
| 30431       | F   | 50  | White                                               | 0           | 0               | Normal           | Normal                            | Normal                                                            | Screening normal                          |
| 30432       | M   | 63  | Black                                               | 0           | 0               | Normal           | Normal                            | Normal                                                            | Screening normal                          |
| 30497       | F   | 50  | White                                               | 1           | 1-2             | Low              | Colon                             | Descending                                                        | Hyperplastic polyp                        |
| 30517       | M   | 50  | White                                               | 0           | 0               | Normal           | Normal                            | Normal                                                            | Screening normal                          |
| 30629       | F   | 52  | White                                               | 1           | 1-2             | Low              | Colon                             | Descending                                                        | Tubular Adenoma                           |
| 30651       | M   | 60  | Hispanic, American Indian/Unspecified/Alaska Native | 2           | 1-2             | Advanced Adenoma | Colon                             | Transverse, Descending                                            | Hyperplastic polyp, tubular adenoma       |
| 30771       | M   | 65  | White                                               | 6           | 3+              | Advanced Adenoma | Colon                             | Ascending, Transverse, Descending                                 | Tubular Adenoma                           |
| 30772       | F   | 70  | White                                               | 2           | 1-2             | Low              | Colon                             | Ascending                                                         | Sessile serrated adenoma, Tubular adenoma |
| 30788       | M   | 60  | White                                               | 0           | 0               | Undetermined     | Undetermined                      | Undetermined                                                      | Screening normal                          |
| 30807       | F   | 61  | White                                               | 1           | 1-2             | Advanced Adenoma | Colon                             | Transverse                                                        | Sessile serrated adenoma                  |
| 30808       | F   | 52  | White                                               | 0           | 0               | Low              | Colon                             | Ascending                                                         | Tubular Adenoma                           |
| 30918       | F   | 62  | White                                               | 4           | 3+              | Advanced Adenoma | Colon                             | Ascending & Descending                                            | Sessile serrated adenoma                  |
| 30831       | M   | 55  | White                                               | 3           | 3+              | Low              | Colon                             | Ascending & Transverse                                            | Lymphoid Aggregate, tubular adenoma       |
| 30919       | F   | 61  | White                                               | 3           | 3+              | Low              | Colon and Rectal                  | Ascending & Rectal                                                | Tubular Adenoma                           |
| 30945       | F   | 60  | White                                               | 0           | 0               | Normal           | Normal                            | Normal                                                            | Screening normal                          |
| 30967       | F   | 59  | White                                               | 0           | 0               | Normal           | Normal                            | Normal                                                            | Screening normal                          |
| 30968       | M   | 60  | White                                               | 0           | 0               | Normal           | Normal                            | Normal                                                            | Screening normal                          |
| 31047       | F   | 50  | White                                               | 0           | 0               | Normal           | Normal                            | Normal                                                            | Screening normal                          |
| 31089       | F   | 56  | White                                               | 0           | 0               | Normal           | Normal                            | Normal                                                            | Screening normal                          |
| 31090       | F   | 50  | White                                               | 0           | 0               | Normal           | Normal                            | Normal                                                            | Screening normal                          |
| 31130       | M   | 68  | White                                               | 0           | 0               | Normal           | Normal                            | Normal                                                            | Screening normal                          |
| 31131       | F   | 70  | White                                               | 1           | 1-2             | Advanced Adenoma | Colon                             | Ascending                                                         | Tubulovillous Adenoma                     |
| 31151       | M   | 64  | White                                               | 3           | 3+              | Low              | Colon                             | Ascending & Descending                                            | Lymphoid Aggregate, tubular adenoma       |
| 31167       | M   | 50  | White                                               | 2           | 1-2             | Low              | Colon                             | Transverse                                                        | Tubular Adenoma                           |
| 31227       | F   | 42  | White                                               | 1           | 1-2             | Advanced Adenoma | Colon                             | Ascending                                                         | Sessile serrated adenoma                  |
| 31248       | F   | 55  | Hispanic, American Indian/Unspecified/Alaska Native | 0           | 0               | Normal           | Normal                            | Normal                                                            | Screening normal                          |

| Specimen ID | Sex | Age | Race/Eth. | POLYP COUNT | Polyp Count BIN | Pathology Rating | Polyp Location (Colon vs. Rectum) | Polyp Location effect (Ascending, Transverse, Descending, Rectal) | Pathology Summary                         |
|-------------|-----|-----|-----------|-------------|-----------------|------------------|-----------------------------------|-------------------------------------------------------------------|-------------------------------------------|
| 31273       | F   | 62  | White     | 4           | 3+              | Advanced Adenoma | Rectal                            | Rectal                                                            | Hyperplastic polyp                        |
| 31471       | F   | 51  | White     | 2           | 1-2             | Low              | Colon                             | Ascending                                                         | Sessile serrated adenoma                  |
| 31472       | M   | 30  | White     | 1           | 1-2             | Advanced Adenoma | Colon                             | Descending                                                        | Hyperplastic polyp                        |
| 31488       | F   | 62  | White     | 2           | 1-2             | Low              | Colon                             | Transverse                                                        | Hyperplastic polyp                        |
| 31489       | F   | 56  | White     | 2           | 1-2             | Advanced Adenoma | Colon                             | Ascending                                                         | Sessile serrated adenoma, Tubular adenoma |
| 31527       | F   | 60  | White     | 9           | 3+              | Advanced Adenoma | Colon                             | Ascending, Transverse, Descending                                 | Tubular Adenoma                           |
| 31528       | M   | 72  | White     | 0           | 0               | Normal           | Normal                            | Normal                                                            | Screening normal                          |
| 31532       | F   | 66  | White     | 2           | 1-2             | Advanced Adenoma | Colon                             | Transverse, Descending                                            | Hyperplastic polyp, tubular adenoma       |
| 31530       | M   | 68  | White     | 4           | 3+              | Advanced Adenoma | Colon                             | Ascending, Transverse, Descending                                 | Sessile serrated adenoma                  |
| 31571       | M   | 50  | White     | 0           | 0               | Normal           | Normal                            | Normal                                                            | Screening normal                          |
| 31611       | M   | 55  | White     | 1           | 1-2             | Advanced Adenoma | Colon                             | Transverse                                                        | Tubular Adenoma                           |
| 31612       | F   | 51  | White     | 1           | 1-2             | Low              | Colon                             | Ascending                                                         | Tubular Adenoma                           |
| 31634       | F   | 51  | White     | 0           | 0               | Low              | Colon                             | Normal                                                            | Screening normal                          |
| 31633       | F   | 50  | White     | 1           | 1-2             | Advanced Adenoma | Colon                             | Ascending & Transverse                                            | Sessile serrated adenoma                  |
| 31757       | F   | 40  | White     | 0           | 0               | Normal           | Normal                            | Normal                                                            | Screening normal                          |
| 31947       | F   | 50  | White     | 1           | 1-2             | Low              | Colon                             | Ascending                                                         | Tubular Adenoma                           |
| 31948       | F   | 50  | White     | 1           | 1-2             | Low              | Colon                             | Transverse                                                        | Tubular Adenoma                           |
| 31949       | M   | 64  | White     | 0           | 0               | Normal           | Normal                            | Normal                                                            | Screening normal                          |
| 32312       | M   | 54  | White     | 0           | 0               | Normal           | Normal                            | Normal                                                            | Screening normal                          |
| 32391       | M   | 69  | White     | 2           | 1-2             | Low              | Colon                             | Ascending & Transverse                                            | Sessile serrated adenoma, Tubular adenoma |
| 32392       | F   | 50  | White     | 5           | 3+              | Advanced Adenoma | Colon and Rectal                  | Ascending, Descending, Rectum                                     | Lymphoid Aggregate, tubular adenoma       |
| 32393       | F   | 50  | White     | 3           | 3+              | Low              | Colon                             | Ascending & Descending                                            | Hyperplastic polyp, tubular adenoma       |
| 32488       | M   | 55  | White     | 0           | 0               | Normal           | Normal                            | Normal                                                            | Screening normal                          |
| 32491       | F   | 53  | White     | 0           | 0               | Normal           | Normal                            | Normal                                                            | Screening normal                          |
| 32535       | F   | 53  | White     | 2           | 1-2             | Advanced Adenoma | Colon                             | Ascending                                                         | Sessile serrated adenoma                  |
| 32669       | F   | 77  | White     | 1           | 1-2             | Low              | Colon                             | Ascending                                                         | Tubular Adenoma                           |
| 32670       | M   | 69  | White     | 3           | 3+              | Advanced Adenoma | Colon and Rectal                  | Ascending, Descending, Rectum                                     | Tubular Adenoma                           |
| 32688       | M   | 51  | White     | 4           | 3+              | Advanced Adenoma | Colon                             | Transverse, Descending                                            | Tubular Adenoma                           |
| 32687       | F   | 65  | White     | 3           | 3+              | Advanced Adenoma | Colon                             | Ascending & Transverse                                            | Tubular Adenoma                           |
| 30627       | F   | 69  | White     | 3           | 3+              | Advanced Adenoma | Colon                             | Ascending, Transverse, Descending                                 | Tubular Adenoma                           |
| 32767       | F   | 56  | White     | 1           | 1-2             | Low              | Colon                             | Descending                                                        | Hyperplastic polyp                        |
| 32951       | F   | 57  | White     | 3           | 3+              | Low              | Colon                             | Ascending & Descending                                            | Tubular Adenoma                           |
| 32987       | M   | 52  | White     | 5           | 3+              | Low              | Colon                             | Descending                                                        | Hyperplastic polyp                        |
| 32990       | M   | 50  | White     | 1           | 1-2             | Low              | Colon                             | Transverse                                                        | Sessile serrated adenoma                  |
| 32991       | M   | 51  | White     | 2           | 1-2             | Low              | Colon                             | Descending                                                        | Hyperplastic polyp, tubular adenoma       |
| 33010       | M   | 74  | White     | 3           | 3+              | Low              | Colon and Rectal                  | Ascending & Rectal                                                | Hyperplastic polyp, tubular adenoma       |

| Specimen ID   | Sex | Age | Race/Eth. | POLYP COUNT | Polyp Count BIN | Pathology Rating | Polyp Location (Colon vs. Rectum) | Polyp Location effect (Ascending, Transverse, Descending, Rectal) | Pathology Summary                             |
|---------------|-----|-----|-----------|-------------|-----------------|------------------|-----------------------------------|-------------------------------------------------------------------|-----------------------------------------------|
| 33012         | F   | 56  | White     | 3           | 3+              | Advanced Adenoma | Colon and Rectal                  | Ascending, Transverse, Rectum                                     | Tubulovillous Adenoma                         |
| 33011         | F   | 61  | White     | 2           | 1-2             | Low              | Colon and Rectal                  | Ascending & Rectal                                                | Hyperplastic polyp, tubular adenoma           |
| 33028         | F   | 71  | White     | 4           | 3+              | Advanced Adenoma | Colon                             | Transverse                                                        | Tubular Adenoma, Traditional serrated adenoma |
| 33029         | F   | 62  | White     | 0           | 0               | Normal           | Normal                            | Normal                                                            | Screening normal                              |
| 33072         | F   | 56  | White     | 0           | 0               | Normal           | Normal                            | Normal                                                            | Screening normal                              |
| 33287         | M   | 55  | White     | 0           | 0               | Normal           | Normal                            | Normal                                                            | Screening normal                              |
| 33291         | M   | 66  | White     | 1           | 1-2             | Low              | Colon                             | Ascending                                                         | Tubular Adenoma                               |
| 33467         | F   | 52  | Asian     | 0           | 0               | Normal           | Normal                            | Normal                                                            | Screening normal                              |
| 33635         | F   | 54  | White     | 2           | 1-2             | Advanced Adenoma | Colon                             | Ascending & Descending                                            | Hyperplastic polyp, sessile serrated adenoma  |
| 33636         | M   | 50  | White     | 2           | 1-2             | Low              | Colon                             | Rectal                                                            | Hyperplastic polyp                            |
| 33637         | M   | 52  | White     | 3           | 3+              | Advanced Adenoma | Colon                             | Ascending & Descending                                            | Tubular Adenoma                               |
| 33738         | M   | 56  | White     | 2           | 1-2             | Low              | Colon                             | Descending                                                        | Hyperplastic polyp, tubular adenoma           |
| 33740         | M   | 64  | White     | 1           | 1-2             | Low              | Colon                             | Descending                                                        | Tubular Adenoma                               |
| 33742         | M   | 52  | White     | 1           | 1-2             | Low              | Colon                             | Descending                                                        | Hyperplastic polyp                            |
| 33797         | M   | 51  | White     | 0           | 0               | Normal           | Normal                            | Normal                                                            | Screening normal                              |
| 33798         | F   | 62  | White     | 0           | 0               | Normal           | Normal                            | Normal                                                            | Screening normal                              |
| 33800         | M   | 66  | White     | 2           | 1-2             | Advanced Adenoma | Colon                             | Transverse, Descending                                            | Sessile serrated adenoma                      |
| 33802         | M   | 66  | White     | 0           | 0               | Normal           | Normal                            | Normal                                                            | Screening normal                              |
| 34032 & 30433 | F   | 73  | White     | 3           | 3+              | Advanced Adenoma | Colon                             | Ascending                                                         | Tubular Adenoma                               |
| 34027         | F   | 52  | White     | 0           | 0               | Normal           | Normal                            | Normal                                                            | Screening normal                              |
| 34073         | F   | 65  | White     | 2           | 1-2             | Low              | Colon                             | Descending                                                        | Hyperplastic polyp, sessile serrated adenoma  |
| 34075         | F   | 67  | White     | 1           | 1-2             | Low              | Colon                             | Ascending                                                         | Tubular Adenoma                               |
| 34151         | M   | 52  | White     | 2           | 1-2             | Advanced Adenoma | Colon                             | Ascending & Descending                                            | Hyperplastic polyp, sessile serrated adenoma  |
| 34156         | F   | 66  | White     | 1           | 1-2             | Advanced Adenoma | Colon                             | Descending                                                        | Hyperplastic polyp                            |
| 34175         | F   | 51  | White     | 3           | 3+              | Advanced Adenoma | Colon                             | Ascending & Descending                                            | Tubular adenoma, tubulovillous adenoma        |

| Specimen ID | Sex | Age | Race/Eth. | POLYP COUNT | Polyp Count BIN | Pathology Rating | Polyp Location (Colon vs. Rectum) | Polyp Location effect (Ascending, Transverse, Descending, Rectal) | Pathology Summary                                                              |
|-------------|-----|-----|-----------|-------------|-----------------|------------------|-----------------------------------|-------------------------------------------------------------------|--------------------------------------------------------------------------------|
| 34188       | M   | 50  | White     | 0           | 0               | Normal           | Normal                            | Normal                                                            | Screening normal                                                               |
| 34189       | M   | 67  | White     | 3           | 3+              | Low              | Colon                             | Descending & Rectal                                               | Hyperplastic polyp, tubular adenoma                                            |
| 34207       | M   | 67  | White     | 6           | 3+              | Low              | Colon                             | Ascending, Transverse, Descending                                 | Hyperplastic polyp, tubular adenoma                                            |
| 34209       | F   | 55  | White     | 1           | 1-2             | Low              | Colon                             | Descending                                                        | Tubular Adenoma                                                                |
| 34208       | F   | 68  | White     | 1           | 1-2             | Low              | Colon                             | Ascending                                                         | Tubular Adenoma                                                                |
| 34239       | F   | 57  | White     | 2           | 1-2             | Advanced Adenoma | Colon                             | Ascending & Descending                                            | Hyperplastic polyp, sessile serrated adenoma                                   |
| 34244       | M   | 74  | White     | 1           | 1-2             | Low              | Colon                             | Rectal                                                            | Hyperplastic polyp                                                             |
| 34263       | F   | 52  | White     | 1           | 1-2             | Low              | Colon                             | Rectal                                                            | Tubular Adenoma                                                                |
| 34262       | M   | 66  | White     | 4           | 3+              | Advanced Adenoma | Colon                             | Ascending & Descending                                            | Sessile serrated adenoma, Tubular adenoma                                      |
| 34313       | F   | 66  | White     | 2           | 1-2             | Low              | Colon                             | Ascending & Descending                                            | Hyperplastic polyp, sessile serrated adenoma                                   |
| 34311       | M   | 50  | White     | 2           | 1-2             | Advanced Adenoma | Colon                             | Descending                                                        | Tubular Adenoma                                                                |
| 34315       | F   | 60  | White     | 0           | 0               | Normal           | Normal                            | Normal                                                            | Screening normal                                                               |
| 34312       | F   | 56  | White     | 0           | 0               | Normal           | Normal                            | Normal                                                            | Screening normal                                                               |
| 34314       | F   | 71  | White     | 6           | 3+              | Advanced Adenoma | Colon                             | Ascending, Transverse, Descending                                 | Lymphoid Aggregate, non-neoplastic mucosa, tubular adenoma                     |
| 34347       | F   | 62  | White     | 1           | 1-2             | Advanced Adenoma | Colon                             | Transverse                                                        | Sessile serrated adenoma                                                       |
| 34367       | M   | 50  | White     | 1           | 1-2             | Low              | Colon                             | Rectal                                                            | Hyperplastic polyp                                                             |
| 34368       | F   | 62  | White     | 1           | 1-2             | Low              | Colon                             | Transverse                                                        | Screening normal                                                               |
| 34369       | M   | 60  | White     | 3           | 3+              | Low              | Colon                             | Ascending & Descending                                            | Lymphoid Aggregate, tubular adenoma                                            |
| 34370       | F   | 50  | White     | 1           | 1-2             | Low              | Colon                             | Rectal                                                            | Hyperplastic polyp                                                             |
| 34375       | M   | 59  | White     | 1           | 1-2             | Low              | Colon                             | Ascending                                                         | Tubular Adenoma                                                                |
| 34392       | F   | 51  | White     | 4           | 3+              | Advanced Adenoma | Colon                             | Transverse, Descending, Rectal                                    | Lymphoid aggregate, tubulovillous adenoma, tubular adenoma, hyperplastic polyp |
| 34394       | F   | 70  | White     | 1           | 1-2             | Low              | Colon                             | Descending                                                        | Hyperplastic polyp, lymphoid aggregate                                         |
| 34395       | F   | 64  | White     | 2           | 1-2             | Low              | Colon                             | Ascending & Descending                                            | Hyperplastic polyp, tubular adenoma                                            |
| 34408       | F   | 63  | White     | 0           | 0               | Low              | Colon                             | Normal                                                            | Screening normal                                                               |
| 34409       | M   | 63  | White     | 1           | 1-2             | Low              | Colon                             | Descending                                                        | Non-neoplastic mucosa                                                          |
| 34410       | F   | 66  | White     | 2           | 1-2             | Low              | Colon                             | Ascending                                                         | Tubular Adenoma                                                                |
| 34411       | F   | 57  | White     | 0           | 0               | Normal           | Normal                            | Normal                                                            | Screening normal                                                               |
| 34412       | M   | 51  | White     | 0           | 0               | Normal           | Normal                            | Normal                                                            | Screening normal                                                               |
| 34413       | F   | 73  | White     | 2           | 1-2             | Low              | Colon                             | Ascending & Transverse                                            | Sessile serrated adenoma, Tubular adenoma                                      |

| Specimen ID | Sex         | Age         | Race/Eth.   | POLYP COUNT | Polyp Count BIN | Pathology Rating | Polyp Location (Colon vs. Rectum) | Polyp Location effect (Ascending, Transverse, Descending, Rectal) | Pathology Summary                         |
|-------------|-------------|-------------|-------------|-------------|-----------------|------------------|-----------------------------------|-------------------------------------------------------------------|-------------------------------------------|
| 34431       | F           | 61          | White       | 4           | 3+              | Advanced Adenoma | Colon                             | Ascending & Descending                                            | Tubular Adenoma                           |
| 34433       | M           | 51          | White       | 2           | 1-2             | Low              | Colon                             | Descending                                                        | Hyperplastic polyp, tubular adenoma       |
| 30939       | M           | 71          | White       | 1           | 1-2             | Low              | Colon                             | Rectal                                                            | Tubular Adenoma                           |
| 1           | M           | 74          | Unspecified | 1           | 1-2             | Low              | Rectal                            | Rectal                                                            | Tubular Adenoma                           |
| 2           | M           | 57          | Unspecified | 1           | 1-2             | Low              | Colon                             | Descending                                                        | Tubular Adenoma                           |
| 3           | F           | 67          | Unspecified | 1           | 1-2             | Low              | Colon                             | Transverse                                                        | Tubular Adenoma                           |
| 4           | M           | 42          | Unspecified | 1           | 1-2             | Low              | Rectal                            | Rectal                                                            | Tubular Adenoma                           |
| 5           | F           | 56          | Unspecified | 2           | 1-2             | Advanced Adenoma | Colon and Rectal                  | Ascending & Rectal                                                | Hyperplastic polyp, tubular adenoma       |
| 6           | M           | 56          | Unspecified | 2           | 1-2             | Advanced Adenoma | Colon and Rectal                  | Descending & Rectal                                               | Hyperplastic polyp, tubular adenoma       |
| 7           | M           | 60          | Unspecified | 1           | 1-2             | Advanced Adenoma | Colon                             | Ascending                                                         | Tubulovillous Adenoma                     |
| 8           | F           | 58          | Unspecified | 3           | 3+              | Advanced Adenoma | Colon                             | Descending                                                        | Tubular Adenoma                           |
| 9           | M           | 64          | Unspecified | 1           | 1-2             | Low              | Colon                             | Ascending                                                         | Tubular Adenoma                           |
| 10          | F           | 57          | Unspecified | 1           | 1-2             | Advanced Adenoma | Colon                             | Ascending                                                         | Inflammatory polyp                        |
| 11          | M           | 65          | Unspecified | 2           | 1-2             | Low              | Colon                             | Transverse, Descending                                            | Tubular Adenoma                           |
| 12          | F           | 66          | Unspecified | 2           | 1-2             | Advanced Adenoma | Colon                             | Ascending                                                         | Tubular Adenoma                           |
| 13          | M           | 66          | Unspecified | 2           | 1-2             | Advanced Adenoma | Colon                             | Ascending                                                         | Sessile serrated adenoma                  |
| 14          | Unspecified | Unspecified | Unspecified | 0           | 0               | Low              | Unspecified                       | Unspecified                                                       | Inflammatory polyp                        |
| 15          | F           | 60          | Unspecified | 3           | 3+              | Advanced Adenoma | Colon                             | Ascending & Transverse                                            | Tubular Adenoma                           |
| 16          | M           | 54          | Unspecified | 3           | 3+              | Advanced Adenoma | Colon and Rectal                  | Transverse, Descending, Rectal                                    | Tubular Adenoma                           |
| 17          | M           | 63          | Unspecified | 2           | 1-2             | Low              | Colon                             | Ascending & Descending                                            | Hyperplastic polyp, tubular adenoma       |
| 18          | M           | 54          | Unspecified | 2           | 1-2             | Low              | Colon and Rectal                  | Transverse & Rectum                                               | Hyperplastic polyp, tubular adenoma       |
| 19          | M           | 63          | Unspecified | 3           | 3+              | Advanced Adenoma | Colon                             | Descending                                                        | Tubular Adenoma                           |
| 20          | M           | 59          | Unspecified | 1           | 1-2             | Advanced Adenoma | Colon                             | Descending                                                        | Tubulovillous Adenoma                     |
| 21          | M           | 61          | Unspecified | 2           | 1-2             | Advanced Adenoma | Colon                             | Ascending & Descending                                            | Tubular adenoma, tubulovillous adenoma    |
| 22          | M           | 53          | Unspecified | 3           | 3+              | Advanced Adenoma | Colon                             | Ascending                                                         | Tubular Adenoma                           |
| 23          | F           | 76          | Unspecified | 3           | 3+              | Advanced Adenoma | Colon and Rectal                  | Ascending, Descending, Rectum                                     | Tubulovillous Adenoma                     |
| 24          | M           | 58          | Unspecified | 1           | 1-2             | Advanced Adenoma | Rectal                            | Rectal                                                            | Tubulovillous Adenoma                     |
| 25          | M           | 64          | Unspecified | 5           | 3+              | Advanced Adenoma | Colon and Rectal                  | Ascending, Transverse, Descending, Rectum                         | Hyperplastic polyp, tubular adenoma       |
| 26          | M           | 61          | Unspecified | 1           | 1-2             | Low              | Colon and Rectal                  | Descending & Rectal                                               | Hyperplastic polyp                        |
| 27          | Unspecified | Unspecified | Unspecified | 0           | 0               | Low              | Normal                            | Normal                                                            | Screening normal                          |
| 28          | F           | 63          | Unspecified | 5           | 3+              | Advanced Adenoma | Colon and Rectal                  | Ascending, Transverse, Descending, Rectum                         | Hyperplastic polyp, tubular adenoma       |
| 29          | F           | 55          | Unspecified | 2           | 1-2             | Advanced Adenoma | Colon                             | Ascending & Transverse                                            | Sessile serrated adenoma                  |
| 30          | F           | 55          | Unspecified | 3           | 3+              | Advanced Adenoma | Colon                             | Ascending                                                         | Tubular adenoma, tubulovillous adenoma    |
| 32          | M           | 66          | Unspecified | 1           | 1-2             | Low              | Colon                             | Descending                                                        | Tubular Adenoma                           |
| 33          | F           | 67          | Unspecified | 2           | 1-2             | Advanced Adenoma | Colon                             | Ascending & Transverse                                            | Sessile serrated adenoma, Tubular adenoma |
| 34          | M           | 76          | Unspecified | 2           | 1-2             | Advanced Adenoma | Colon                             | Ascending & Transverse                                            | Tubular Adenoma                           |
| 35          | M           | 79          | Unspecified | 2           | 1-2             | Advanced Adenoma | Colon                             | Ascending & Transverse                                            | Tubular Adenoma                           |

## Colectomy/Cancer Cases

| Sample Code (Specimen ID) | Sex | Age | Race/Eth.                      | T-Stage | N-Stage | Generic stage | Age at diagnosis | Lymphovascular invasion | Neural invasion | Pre-Op CEA Level | Known Familial Cancer Syndrome |
|---------------------------|-----|-----|--------------------------------|---------|---------|---------------|------------------|-------------------------|-----------------|------------------|--------------------------------|
| 21651                     | M   | 82  | White                          | T2      | N0      | Stage 1       | 82               | Present                 | Absent          | 1.3              | No                             |
| 22287                     | F   | 75  | White                          | T2      | N0      | Stage 1       | 75               | Absent                  | Absent          | 1.9              | No                             |
| 22529                     | M   | 56  | White                          | T3      | N1C     | Stage 3       | 56               | Absent                  | Absent          | 5.5              | Unspecified                    |
| 22567                     | F   | 78  | White                          | T3      | N2A     | Stage 3       | 78               | Absent                  | Absent          | 3.6              | Unspecified                    |
| 22611                     | M   | 55  | White                          | T1      | N0      | Stage 1       | 55               | Absent                  | Absent          | 2.2              | Yes-Mother                     |
| 22707                     | M   | 75  | White                          | T3      | N0      | Stage 2       | 75               | Absent                  | Absent          | 2.3              | No                             |
| 22741                     | F   | 49  | White                          | T3      | N0      | Stage 2       | 49               | Not marked              | Absent          | less than 0.5    | No                             |
| 23311                     | F   | 86  | White                          | T3      | N0      | Stage 2       | 86               | Absent                  | Absent          | 2.7              | No                             |
| 23548                     | F   | 59  | White                          | T2      | N0      | Stage 1       | 59               | Absent                  | Absent          | 1.7              | No                             |
| 23651                     | F   | 72  | Black                          | T3      | N0      | Stage 2       | 72               | Absent                  | Absent          | 6.3              | Yes                            |
| 23891                     | M   | 49  | American Indian/Alaskan Native | T2      | N0      | Stage 1       | 49               | Absent                  | Absent          | 1.8              | No                             |
| 23996                     | M   | 78  | White                          | T3      | N0      | Stage 2       | 78               | Absent                  | Absent          | Unspecified      | No                             |
| 24447                     | F   | 41  | White                          | T2      | N1A     | Stage 3       | 41               | Absent                  | Absent          | 1.29             | No                             |
| 25253                     | F   | 86  | White                          | T2      | N0      | Stage 1       | 86               | Absent                  | Absent          | 1.7              | Unspecified                    |
| 25274                     | F   | 60  | White                          | T1      | N0      | Stage 1       | 60               | Absent                  | Absent          | less than 0.5    | Yes                            |
| 25307                     | M   | 73  | White                          | T1      | N0      | Stage 1       | 73               | Absent                  | Absent          | 1.3              | No                             |
| 25449                     | F   | 72  | White                          | T3      | N0      | Stage 2       | 72               | Absent                  | Absent          | 1.5              | No                             |
| 25527                     | M   | 50  | White                          | T1      | N0      | Stage 1       | 50               | Absent                  | Absent          | 1.7              | Yes                            |
| 25628                     | M   | 74  | White                          | T4a     | N1A     | Stage 3       | 74               | Absent                  | Absent          | 1.9              | No                             |
| 25873                     | M   | 74  | White                          | T3      | N0      | Stage 2       | 74               | Present                 | Present         | 2                | Unspecified                    |
| 27876                     | F   | 88  | White                          | T3      | N0      | Stage 2       | 88               | Absent                  | Absent          | 43               | Unspecified                    |
| 27871                     | F   | 53  | White                          | T3      | N1C     | Stage 3       | 53               | Absent                  | Absent          | 119              | Unspecified                    |
| 27711                     | M   | 47  | White                          | T2      | N2A     | Stage 3       | 47               | Present                 | Absent          | 1.3              | No                             |
| 27671                     | M   | 64  | Black                          | T1      | N0      | Stage 1       | 64               | Absent                  | Absent          | 6.4              | Yes                            |
| 27616                     | F   | 79  | White                          | T3      | N0      | Stage 2       | 79               | Absent                  | Absent          | Unspecified      | Yes                            |
| 27431                     | M   | 74  | White                          | T3      | N1A     | Stage 3       | 74               | Absent                  | Absent          | 1.2              | No                             |
| 27213                     | M   | 65  | White                          | T3      | N0      | Stage 2       | 65               | Absent                  | Absent          | 2                | No                             |
| 27067                     | M   | 57  | White                          | T3      | N0      | Stage 2       | 57               | Present                 | Absent          | 4.2              | Yes                            |



| Sample Code (Specimen ID) | Sex | Age | Race/Eth. | T-Stage | N-Stage | Generic stage        | Age at diagnosis | Lymphovascular invasion | Neural invasion | Pre-Op CEA Level | Known Familial Cancer Syndrome |
|---------------------------|-----|-----|-----------|---------|---------|----------------------|------------------|-------------------------|-----------------|------------------|--------------------------------|
| 26747                     | F   | 68  | White     | N/A     | N/A     | Neuroendocrine Tumor | 68               | Unspecified             | Unspecified     | Unspecified      | Unspecified                    |
| 26727                     | M   | 69  | White     | T2      | N0      | Stage 1              | 69               | Absent                  | Absent          | 0.9              | Yes                            |
| 26689                     | F   | 71  | White     | T1      | N0      | Stage 1              | 71               | Unspecified             | Unspecified     | 1.8              | Yes                            |
| 26447                     | F   | 61  | White     | T3      | N2B     | Stage 3              | 61               | Present                 | Absent          | 1.9              | No                             |
| 26131                     | F   | 75  | White     | T2      | N0      | Stage 1              | 75               | Absent                  | Absent          | 0.7              | No                             |
| 26108                     | M   | 87  | White     | T2      | N0      | Stage 1              | 86               | Absent                  | Absent          | 3.5 (post op)    | Unspecified                    |
| 26067                     | M   | 56  | White     | T2      | N0      | Stage 1              | 56               | Absent                  | Absent          | Not uploaded     | Yes                            |
| 28112                     | M   | 87  | White     | T2      | N0      | Stage 1              | 86               | Absent                  | Absent          | Unspecified      | No                             |
| 28753                     | M   | 37  | White     | T2      | N1b     | Stage 3              | 37               | Absent                  | Absent          | Unspecified      | No                             |
| 28281                     | F   | 62  | White     | T2      | N0      | Stage 1              | 62               | Present                 | Absent          | 1.1              | No                             |
| 28007                     | M   | 61  | White     | T3      | N0      | Stage 2              | 61               | Absent                  | Absent          | 3.1              | No                             |
| 28907                     | M   | 38  | White     | T2      | N0      | Stage 1              | 38               | Present                 | Absent          | 1                | No                             |
| 29527                     | F   | 44  | White     | T2      | N0      | Stage 1              | 44               | Absent                  | Absent          | <0.5             | No                             |
| 29992                     | M   | 55  | White     | T3      | N1A     | Stage 3              | 55               | Absent                  | Absent          | 3.2              | No                             |
| 29588                     | M   | 67  | White     | T3      | N2B     | Stage 3              | 67               | Present                 | Absent          | 2.5              | No                             |
| 30707                     | M   | 59  | White     | T1      | N0      | Stage 1              | 59               | Absent                  | Absent          | 2                | No                             |
| 30920                     | F   | 58  | White     | T2      | N0      | Stage 1              | 58               | Absent                  | Absent          | 1                | First Cousin                   |
| 30871                     | F   | 50  | White     | T2      | N0      | Stage 1              | 50               | Absent                  | Absent          | 27.5             | Yes                            |
| 30887                     | M   | 39  | White     | pT4     | pN1     | Stage 3              | 35               | Unspecified             | Unspecified     | 2.6              | No                             |
| 31207                     | F   | 61  | White     | ypT0    | ypN0    | Post Chemoradiation  | 60               | Absent                  | Absent          | 2.2              | No                             |
| 31971                     | F   | 47  | White     | T3      | N0      | Stage 2              | 47               | Absent                  | Absent          | 23.7             | Unspecified                    |

**Appendix 5:** Relative area ratio-to-reference standard for patient groups compared in the study.

| Relative Ratio-To-Reference Standard |                          |                              |                             |                                            |                                             |                                             |                                     |                                   |                                 |                               |
|--------------------------------------|--------------------------|------------------------------|-----------------------------|--------------------------------------------|---------------------------------------------|---------------------------------------------|-------------------------------------|-----------------------------------|---------------------------------|-------------------------------|
| Protein                              | Cancer Median Expression | Non-Cancer Median Expression | Advanced Adenoma Expression | Normal and Non-advanced Adenoma Expression | Median Local Cancer Expression (Stages 1&2) | Median Regional Cancer Expression (Stage 3) | Median Female Non-cancer expression | Median Male Non-cancer Expression | Median Female CANCER expression | Median Male CANCER Expression |
| FETUB                                | 3.85                     | 4.77                         | 4.565                       | 4.83                                       | 3.78                                        | 3.855                                       | 4.87                                | 4.57                              | 3.74                            | 3.855                         |
| EGFR                                 | 0.0451                   | 0.050319                     | 0.04969                     | 0.05091                                    | 0.0451                                      | 0.0447                                      | 0.0496                              | 0.0518                            | 0.0451                          | 0.0451                        |
| ITIH3                                | 2.46                     | 1.31                         | 1.2481                      | 1.34                                       | 2.54                                        | 1.8                                         | 1.29                                | 1.345                             | 2.86                            | 2.07                          |
| LRG1                                 | 4.28                     | 2.85                         | 2.6974                      | 2.96                                       | 4.28                                        | 4.26                                        | 2.97                                | 2.72440482                        | 4.46                            | 4.11                          |
| ITIH4                                | 2.21                     | 1.66                         | 1.65                        | 1.68                                       | 2.21                                        | 2.17                                        | 1.72                                | 1.639732                          | 2.21                            | 2.17                          |
| CD44                                 | 0.6                      | 0.68                         | 0.6725                      | 0.69                                       | 0.65                                        | 0.47                                        | 0.67                                | 0.688042                          | 0.62                            | 0.6                           |
| CRP                                  | 0.88                     | 0.495                        | 0.61                        | 0.42                                       | 0.77                                        | 1.11                                        | 0.42                                | 0.53                              | 0.88                            | 0.92                          |
| VITD                                 | 1.44                     | 1.39                         | 1.3783                      | 1.3959                                     | 1.41                                        | 1.53                                        | 1.38                                | 1.39842815                        | 1.43                            | 1.44                          |
| HPX                                  | 10.36                    | 6.99                         | 6.9022                      | 7.0377                                     | 10.49                                       | 10.15                                       | 6.92                                | 7.03237614                        | 9.79                            | 10.73                         |
| CFI                                  | 4.51                     | 4.64                         | 4.66289                     | 4.62218                                    | 4.49                                        | 5.11                                        | 4.64                                | 4.655955                          | 4.11                            | 5.23                          |
| APCS                                 | 6.49                     | 6.73                         | 6.9335                      | 6.6372                                     | 6.45                                        | 7.27                                        | 6.18                                | 7.54893619                        | 5.47                            | 9.22                          |
| F5                                   | 0.95                     | 0.85                         | 0.8654                      | 0.84                                       | 1.02                                        | 0.87                                        | 0.83                                | 0.87                              | 0.95                            | 0.95                          |
| SOD3                                 | 0.15                     | 0.159                        | 0.1593                      | 0.1595                                     | 0.15                                        | 0.14                                        | 0.17                                | 0.15                              | 0.18                            | 0.14                          |
| PI16                                 | 0.35                     | 0.45                         | 0.4519                      | 0.4549                                     | 0.33                                        | 0.385                                       | 0.47                                | 0.43673113                        | 0.33                            | 0.4                           |
| QSOX1                                | 0.22                     | 0.177                        | 0.1715                      | 0.1773                                     | 0.231                                       | 0.204                                       | 0.16536987                          | 0.1925                            | 0.23                            | 0.22                          |
| DPP4                                 | 0.059                    | 0.07705                      | 0.0751                      | 0.07759                                    | 0.0546                                      | 0.0599                                      | 0.07613524                          | 0.07766597                        | 0.056                           | 0.06                          |
| CDH2                                 | 0.024                    | 0.026                        | 0.025                       | 0.02613                                    | 0.025                                       | 0.0225                                      | 0.024                               | 0.02746199                        | 0.025                           | 0.024                         |

**Appendix 6:** ROC curves for Cancer vs. Cancer-free for 2-4 marker panels. Curves on the left represent the pooled ROC generated from the training data using leave-one-out cross validation.

Curves on the right represent validation ROCs for the specified model and listed biomarkers.

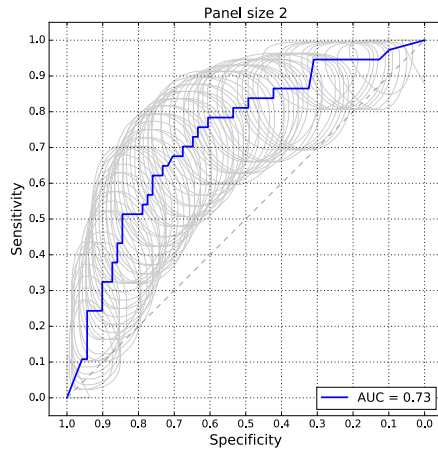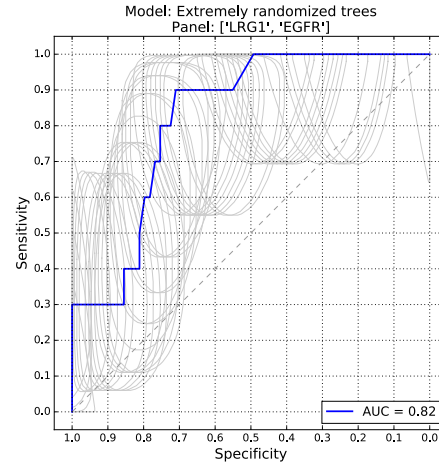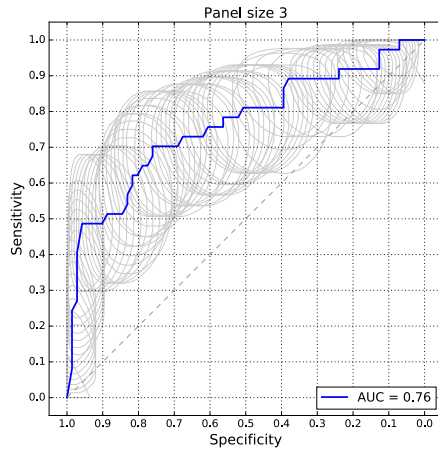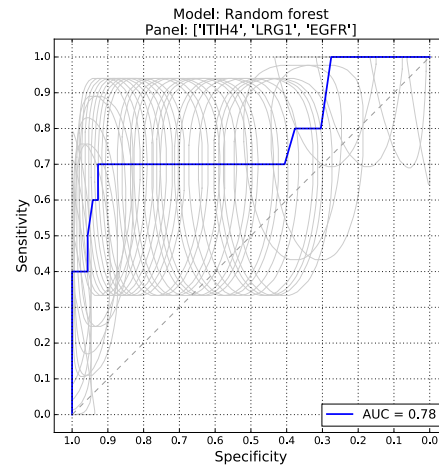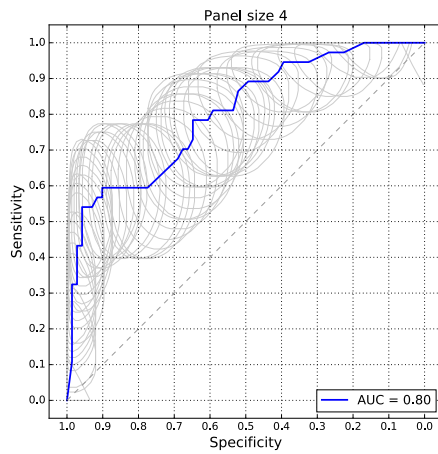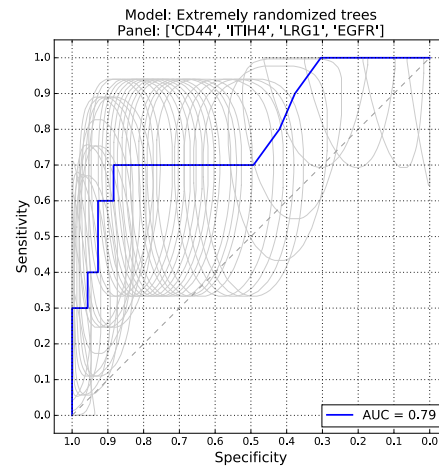

**Appendix 7: ROC curves for Localized Cancer vs. Regional for 2, 3, and 5 marker panels.**

Curves represent the pooled ROC generated from the training data using leave-one-out cross validation. The optimal method and panel selected for validation is listed.

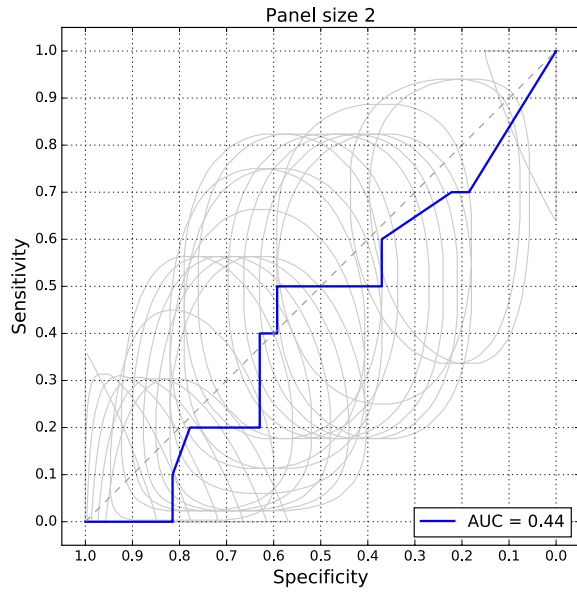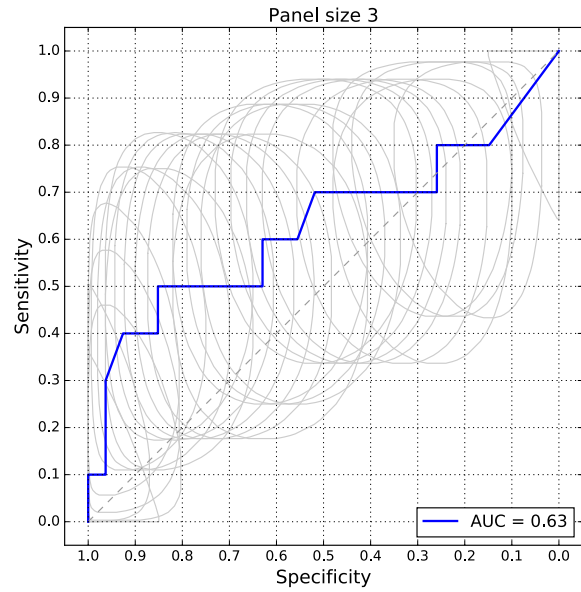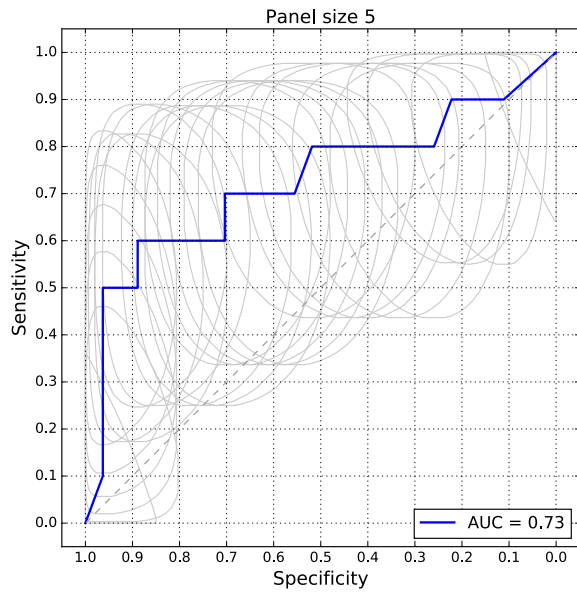

Panel Size 2: GC, CD44  
Random Forest

Panel Size 3: GC, CD44, CRP  
Random Forest

Panel Size 4: GC, CD44, ITIH3, CRP  
Random Forest
